# Supplementary material
Source: PubMed Central journal article supplement (PMC5338611)

## SUPPLEMENTAL INFORMATION

### SUPPLEMENTAL FIGURE LEGENDS

#### **Figure S1. *pdgfb* and *pdgfrb* expression levels are increased in the VDA by HIF1 $\alpha$**

(A) qPCR analysis showed expression of *pdgfrb* and *pdgfb* is significantly upregulated with exposure to the Hif1 $\alpha$  agonist DMOG (75uM, 22-36hpf), but related factors are not statistically altered (\*p<0.05, \*\*p<0.01, two-tailed t-test, n $\geq$ 3).

(B) qPCR analysis using FACS-sorted populations from *Tg(flkl:dsRed;cmyb:egfp)* embryos at 48hpf indicated that *pdgfb* and *pdgfrb* are expressed in the vasculature (Flk1:dsRed<sup>+</sup>;cMyb:GFP<sup>-</sup>) and HSCs (Flk1:dsRed<sup>+</sup>;cMyb:GFP<sup>+</sup>) as well as unlabeled embryonic tissues (normalized to *tbp*).

(C) qPCR analysis of sorted populations from DMSO or CoCl<sub>2</sub> treated embryos showed that *pdgfb* was upregulated by CoCl<sub>2</sub> in the endothelium (Flk1<sup>+</sup>;cMyb<sup>-</sup>), while *pdgfrb* was upregulated in both the endothelium (Flk1<sup>+</sup>;cMyb<sup>-</sup>) and HSCs (Flk1<sup>+</sup>;cMyb<sup>+</sup>) (*data shown as fold change in gene expression (normalized to *tbp*) by CoCl<sub>2</sub> relative to DMSO*).

(D) WISH analysis for *flkl* in embryos treated the pan-PDGFR inhibitor AG1295 or the PDGFR $\beta$  selective antagonist DMPQ showed no gross impact of treatment on the trunk vasculature compared to controls at 36hpf (n $\geq$ 20/condition x 2 replicate clutches).

(E) WISH analysis for *ephrinb2a* in embryos exposed to AG1295 and DMPQ treated showed no difference from controls in arterial identity (n value as in S1D).

(F) Notch activity in the ventral dorsal aorta (VDA) as marked by *gfp* expression in the *Tg(EPV.Tp1CMmu.Hbb:EGFP)* Notch reporter line was reduced with AG1295 treatment compared to controls, but not with DMPQ.

(G) Qualitative phenotypic distribution of embryos from panel S1F (n values as in S1D)

**Figure S2. Loss of *pdgfrb* impairs Hif1 $\alpha$ -mediated HSPC regulation independent of hemogenic niche formation**

- (A) Expression of *flk1* was grossly unaffected in the vasculature of embryos injected with *pdgfrb* MO in comparison to sibling controls (n $\geq$ 20/condition x 2 replicate clutches).
- (B) Expression of *runx1;cmyb* was decreased by *pdgfrb* knockdown as determined by WISH.
- (C) Qualitative phenotypic distribution of embryos from panel S2B (n value as in S2A).
- (D) WISH analysis for *runx1;cmyb* revealed decreased expression in *pdgfrb*<sup>um148 +/-</sup> embryos, while *pdgfrb*<sup>um148 -/-</sup> embryos were similar to wild-type sibling controls.
- (E) Qualitative phenotypic distribution of embryos from panel S2D (n $\geq$ 20/condition x 4 replicate clutches).
- (F) Embryonic exposure to the PDGFR $\beta$ -selective inhibitor DMPQ (10 $\mu$ M) during HSC formation (Tx 18-36hpf) blocked the increase in *runx1;cmyb* expression in the VDA observed following CoCl<sub>2</sub> exposure.
- (G) Qualitative phenotypic distribution of embryos from panel S2F (n value as in S2A).

**Figure S3. PDGF-B overexpression increases HSPC production in the VDA and CHT**

- (A) *In vivo* imaging of *Tg(flkl:dsRed;cmyb:egfp)* embryos indicated that the number of Flk1<sup>+</sup>;cMyb<sup>+</sup> HSPCs (arrowheads) in the VDA was increased at 36hpf in *pdgfb* mRNA-injected embryos.
- (B) Absolute counts of Flk1<sup>+</sup>;cMyb<sup>+</sup> HSPCs from embryos in panel S3A (Control: 6 $\pm$ 1.5, *pdgfb* mRNA: 10.4 $\pm$ 2.2; \*\*\*p<0.0001, two-tailed t-test, n $\geq$ 15/condition).
- (C) Overexpression of *pdgfb* increased *cmyb* expression in the CHT at 48hpf.

- (D) Qualitative phenotypic distribution of embryos from panel 3D ( $n \geq 20$  condition x 2 replicate clutches).
- (E) Representative images of *Tg(cd41:egfp)* embryos injected with *pdgfb* mRNA showing increase expression in the CHT.
- (F) Absolute cell counts in the CHT of embryos from S3E indicated the number of CD41<sup>+</sup> HSPCs was increased at 48hpf in embryos injected with *pdgfb* mRNA (Control:  $13.1 \pm 7.4$  cells/CHT, *pdgfb* mRNA:  $18.9 \pm 9.8$ ,  $n > 35$ /condition, two-tailed t-test,  $**p < 0.0053$ ).

**Figure S4. PDGF-B signaling regulates the expression of inflammatory factors in the VDA**

- (A) qPCR analysis for inflammatory gene expression in embryos injected with *pdgfb* mRNA showed increased expression of *il1b*, *mmp2*, and *mmp9* ( $*p < 0.05$ ,  $**p < 0.01$ , two-tailed t-test,  $n \geq 3$ ).
- (B) qPCR analysis using FACS-sorted populations from *Tg(flkl1:dsRed;cmyb:egfp)* embryos showed that *il6* and its receptors are primarily expressed in the vasculature (Flk1<sup>+</sup>;cMyb<sup>-</sup>) and HSPCs (Flk1<sup>+</sup>;cMyb<sup>+</sup>) (normalized to *tbp*).
- (C) Exposure to the gp130 inhibitor SC-144 (1 $\mu$ M) blocked the ability of *pdgfb* mRNA to increase *runx1;cmyb* expression at 36hpf.
- (D) Qualitative phenotypic distribution of embryos from panel S4C ( $n \geq 20$ /condition x 3 replicate clutches).
- (E) *il6* overexpression strongly increased *runx1* expression in the VDA at 36hpf.
- (F) Qualitative phenotypic distribution of embryos from panel S4E ( $n \geq 20$ /condition x 3 replicate clutches).

**Figure S5. Hif1 $\alpha$  regulates inflammatory signaling to impact HSPC production**

(A) qPCR analysis of FACS sorted populations from DMSO or CoCl<sub>2</sub> treated embryos indicated that *il6* and its receptor *il6r* were upregulated by CoCl<sub>2</sub> in the endothelium (Flk1<sup>+</sup>;cMyb<sup>-</sup>) and in HSPCs (Flk1<sup>+</sup>;cMyb<sup>+</sup>) compared to matched control samples (*data shown as fold change in gene expression (normalized to tbp) by CoCl<sub>2</sub> relative to that of DMSO controls*).

(B) Exposure to SC-144 (1μM) blocked the ability of CoCl<sub>2</sub> to increase *runx1;cmyb* expression in the VDA.

(C) Qualitative phenotypic distribution of embryos from panel S5B (n≥20/condition x 3 replicate clutches).

## SUPPLEMENTAL METHODS

**Supplemental Methods Table 1: Morpholino sequences** (related to: *Morpholino and mRNA Injection*)

| Gene          | Morpholino sequence       | Reference                       |
|---------------|---------------------------|---------------------------------|
| <i>vhl</i>    | GGCATCGTCAAAGACAGGACAGTTC | (Harris et al., 2013)           |
| <i>hif1ab</i> | ACCCTACAAAAGAAAGAAGGAGAGC | (Mendelsohn et al., 2008)       |
| <i>pdgfrb</i> | ACAGGAACTGAAGTCACTGACCTTC | (Wiens et al., 2010)            |
| <i>il6</i>    | AAACCAGTATATAACAGCACCTGCT | <i>not previously published</i> |

**Supplemental Methods Table 2: Primer Sequences** (related to: *Quantitative RT-PCR*)

| Gene           | Forward                | Reverse                      | Reference                    |
|----------------|------------------------|------------------------------|------------------------------|
| <i>tbp</i>     | CGGTGGATCCTGCGAATTA    | TGACAGGTTATGAAGCAAACA<br>ACA | (McCurley and Callard, 2008) |
| <i>runx1</i>   | CGTCTTCACAAACCCTCCTCAA | GCTTTACTGCTTCATCCGGCT        | (Harris et al., 2013)        |
| <i>cmyb</i>    | TGATGCTTCCCAACACAGAG   | TTCAGAGGGAATCGTCTGCT         | (Harris et al., 2013)        |
| <i>gp130</i>   | TTGATGTGTGAAGCCTCCAG   | TGGGTCTCTCAATCCTGGTT         |                              |
| <i>il6</i>     | TCCCCGTGTTCAGCAGTATG   | GCGGTCTGAAGGTTTGAGGA         |                              |
| <i>il6R</i>    | TGGCTGTATGTGTCTTGTGC   | TGGCTGAACAGGAAGGAAGT         |                              |
| <i>pdgfa</i>   | GGACCCTCTTCTCCATCTC    | TGGGACACGTAAGTACAGC          | (Harris et al., 2013)        |
| <i>pdgfb</i>   | CAAGACCCTGCAGTGTGTTC   | CACGTGCGTCTAGTTTCTGG         |                              |
| <i>pdgfaa</i>  | AAACAAGGCCACCATAAGGA   | GCTGTTGGATCCACCTGACT         |                              |
| <i>pdgfrb</i>  | ACACACCGGGGTTTATGTGT   | TATTGATGGGTTTCGTCACCA        |                              |
| <i>pdgfra</i>  | GCTCATGATGAAGTGCTGGA   | TCATCAAAGCCACTCTCACG         |                              |
| <i>stat3</i>   | GCAGGAGAACAACGTCCTGT   | TGATGTCTGCAGGTTGTGT          |                              |
| <i>mmp2</i>    | GCTGTTCCCGATGACCTAGA   | GCTGTCATTTCTGGCCATTT         |                              |
| <i>mmp9</i>    | TCATGATCTCTGCGAAGTGG   | TTGCCTTTTCTCTCTGCAT          |                              |
| <i>b-actin</i> | TCTGTCCA TGCCAACCA T   | TGCCCTCGTGCTGTTTT            | (Harris et al., 2013)        |

## **SUPPLEMENTAL METHODS CITATIONS:**

Harris, J.M., Esain, V., Frechette, G.M., Harris, L.J., Cox, A.G., Cortes, M., Garnaas, M.K., Carroll, K.J., Cutting, C.C., Khan, T., *et al.* (2013). Glucose metabolism impacts the spatiotemporal onset and magnitude of HSC induction in vivo. *Blood* 121, 2483-2493.

McCurley, A.T., and Callard, G.V. (2008). Characterization of housekeeping genes in zebrafish: male-female differences and effects of tissue type, developmental stage and chemical treatment. *BMC molecular biology* 9, 102.

Mendelsohn, B.A., Kassebaum, B.L., and Gitlin, J.D. (2008). The zebrafish embryo as a dynamic model of anoxia tolerance. *Developmental dynamics : an official publication of the American Association of Anatomists* 237, 1780-1788.

Wiens, K.M., Lee, H.L., Shimada, H., Metcalf, A.E., Chao, M.Y., and Lien, C.L. (2010). Platelet-derived growth factor receptor beta is critical for zebrafish intersegmental vessel formation. *PloS one* 5, e11324.

Figure S1.

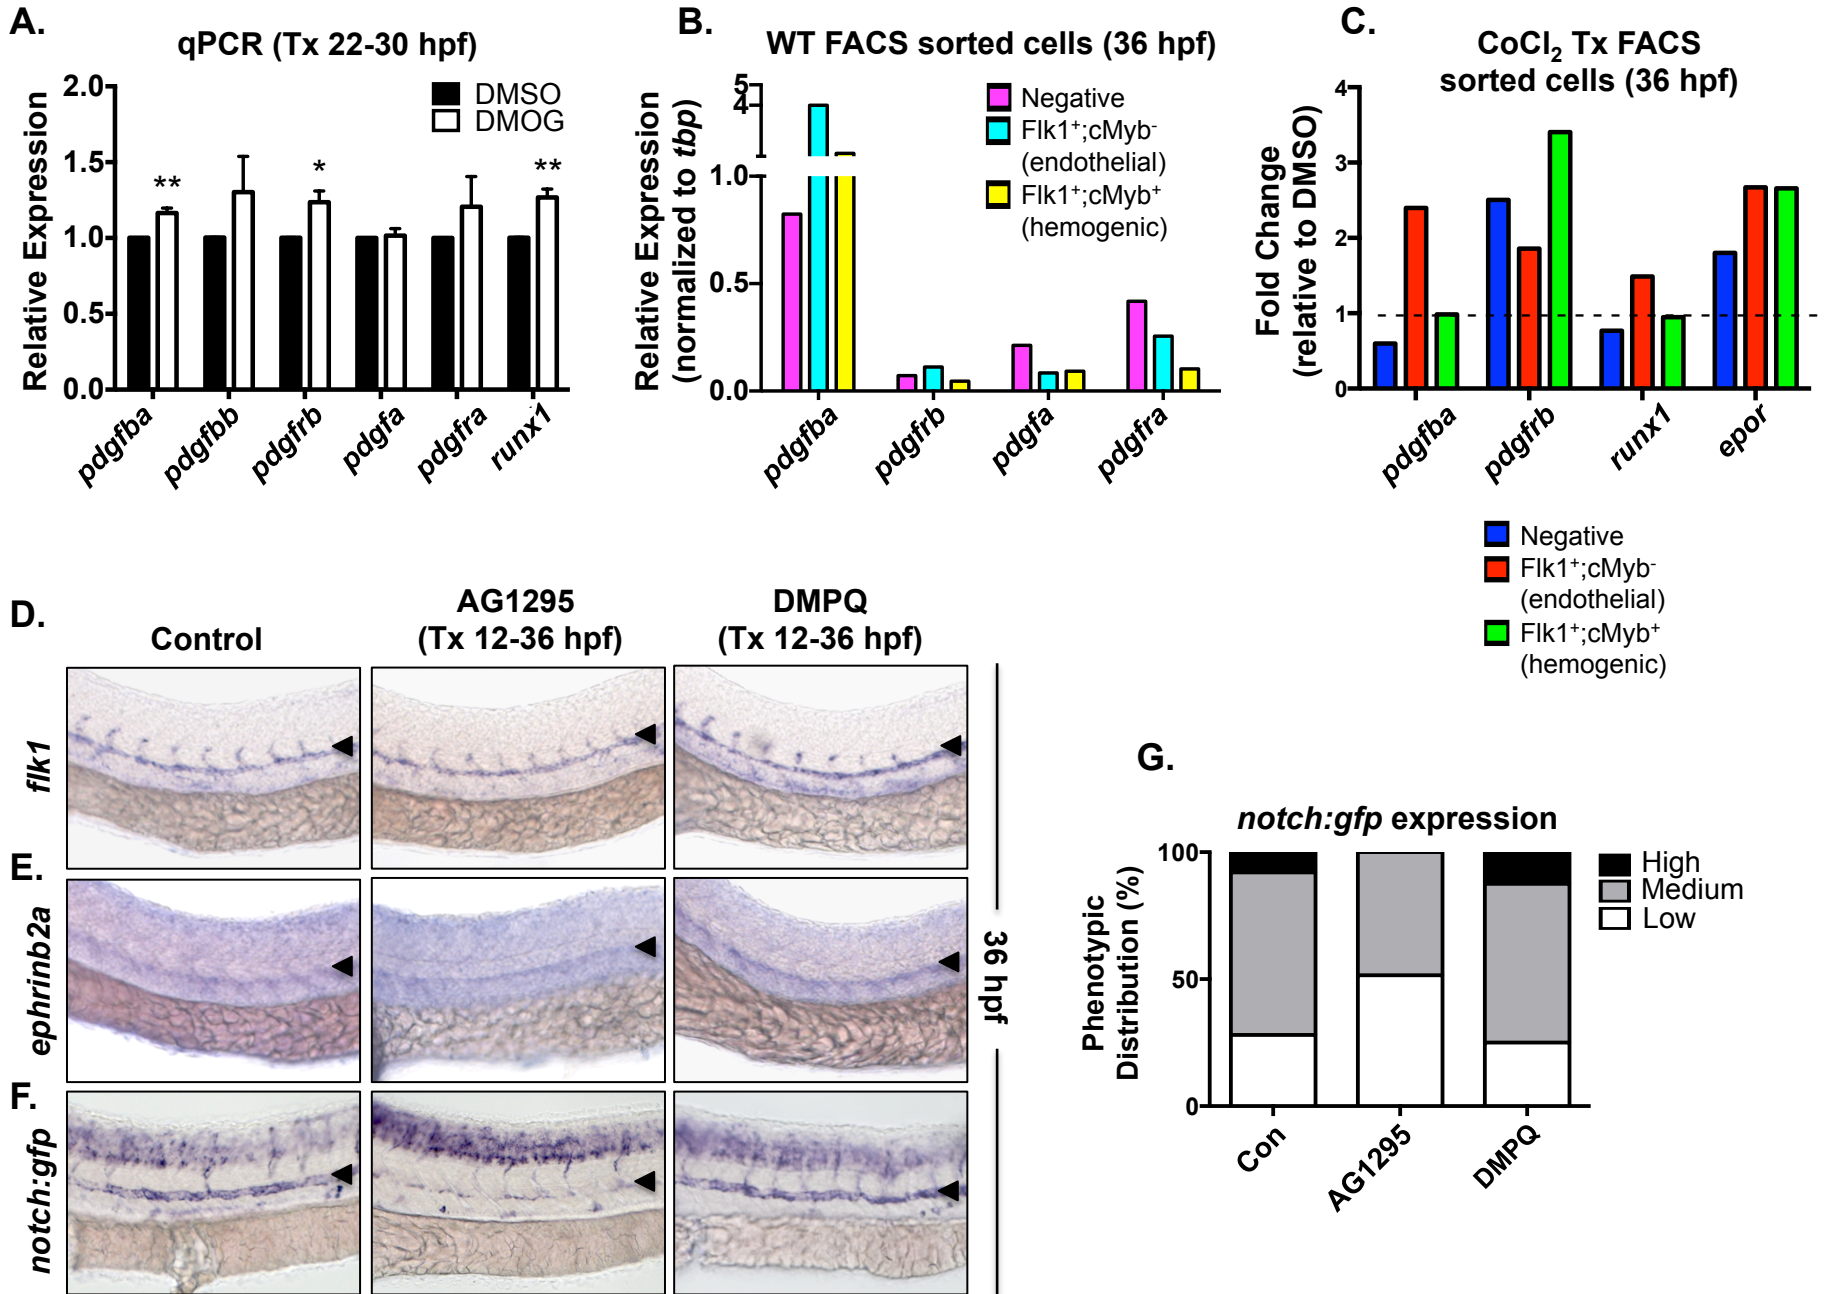

**Figure S2.**

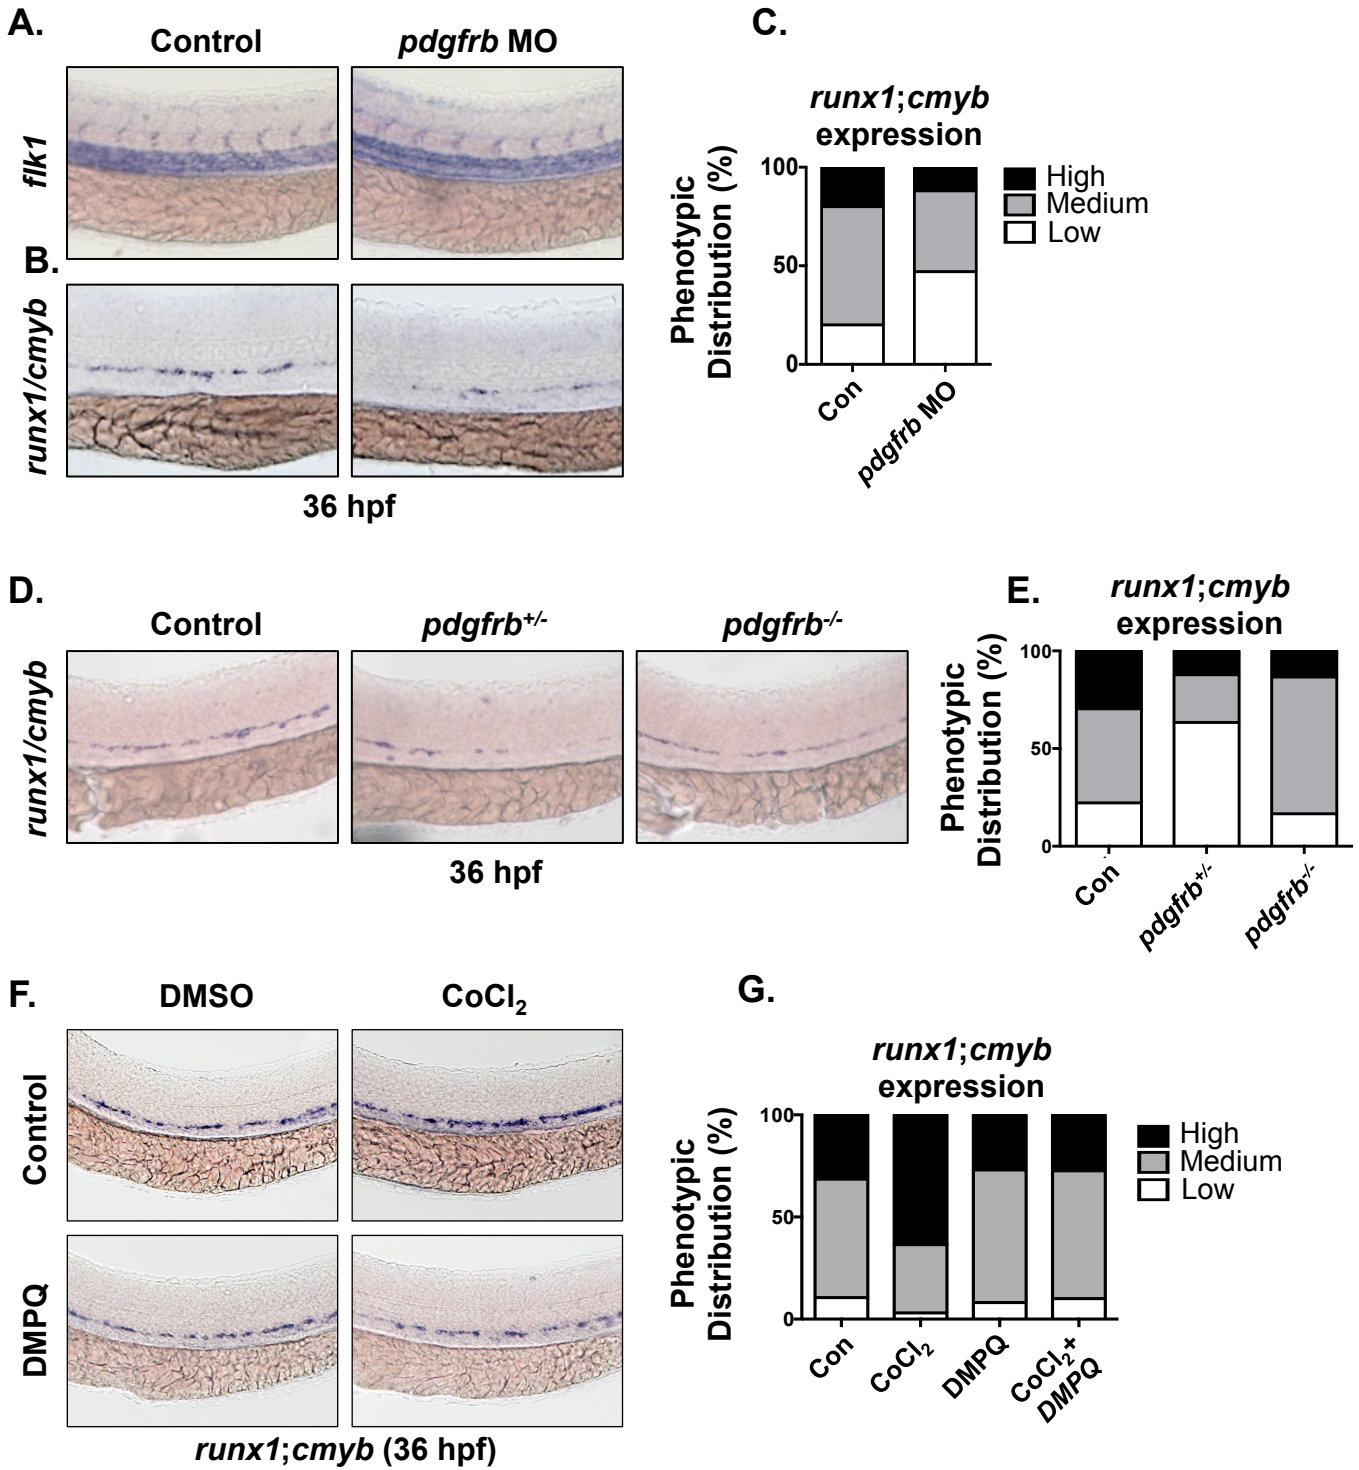



Figure S3.

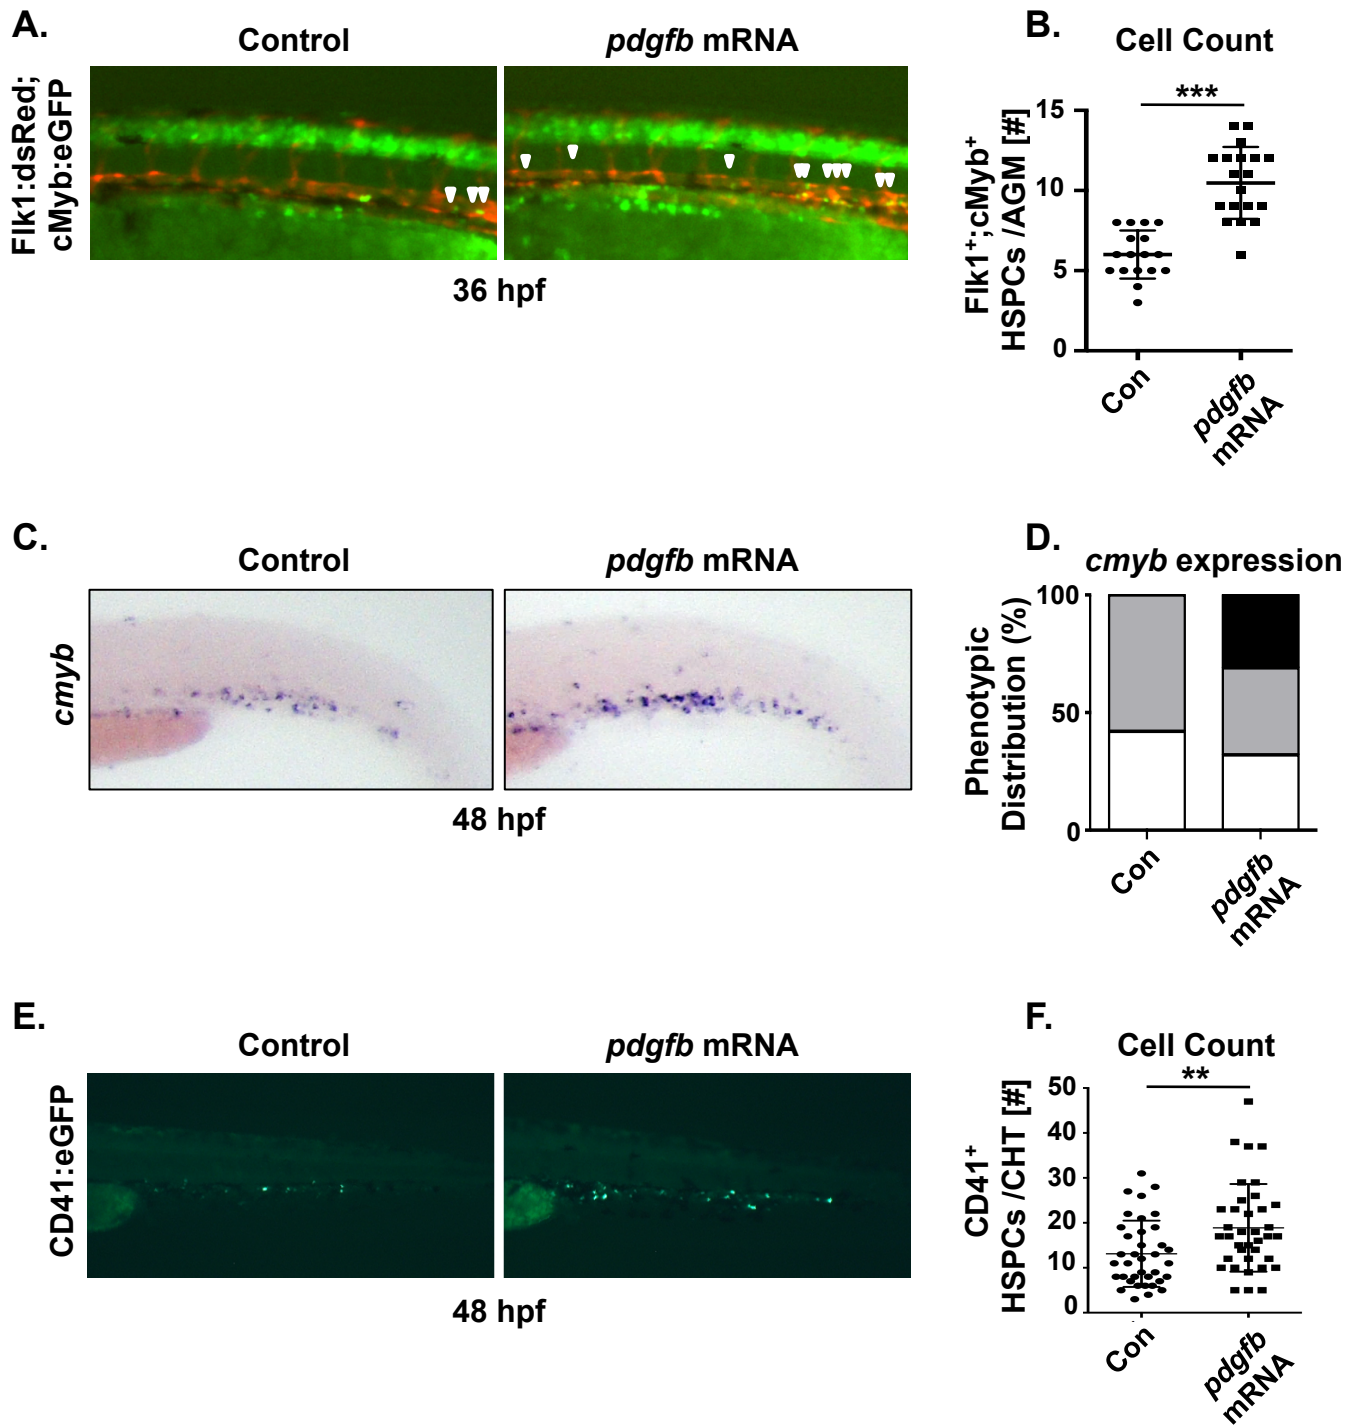

**Figure S4.**

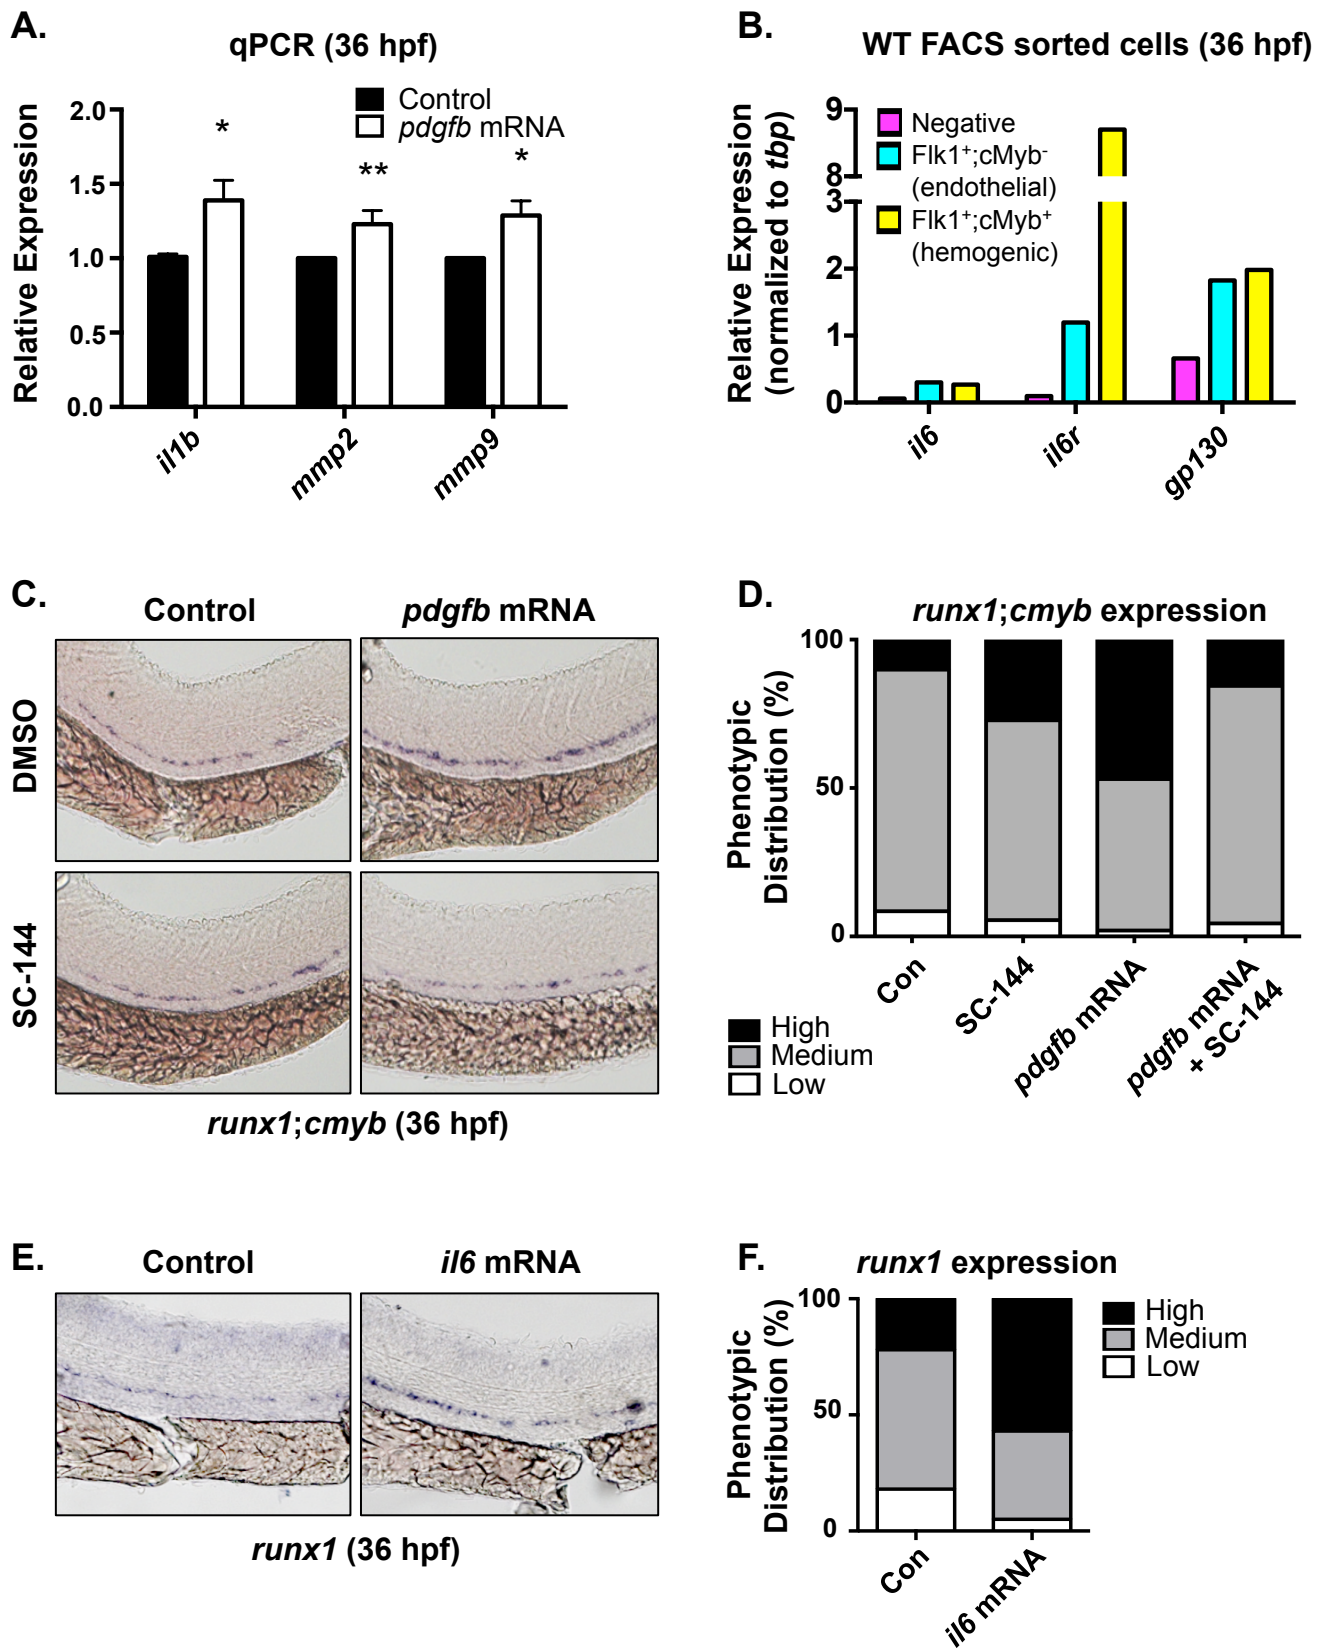

**Figure S5.**

**A.**

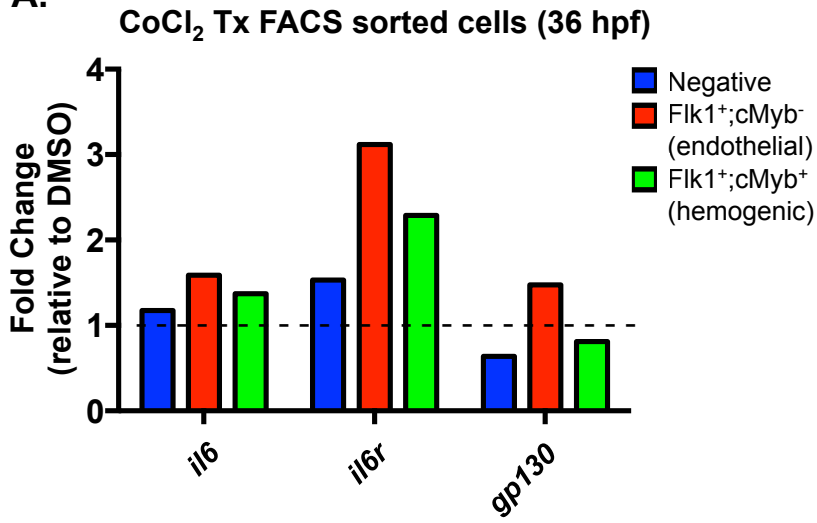

**B.**

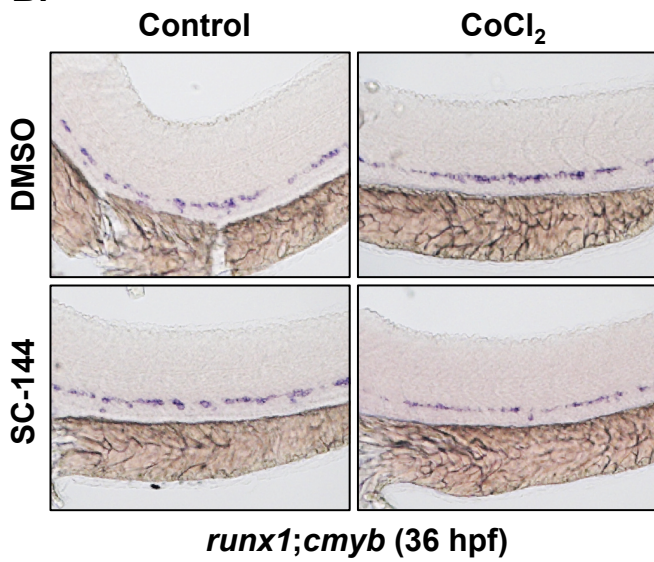

**C.**

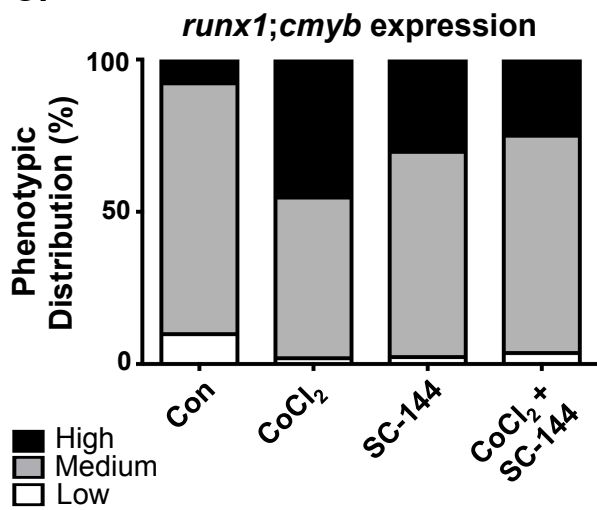

Supplement: NIHMS823327-supplement-01.pdf [file NIHMS823327-supplement-01.pdf]
